# Supplementary material for: NeatSeq-Flow: A Lightweight High-Throughput Sequencing Workflow Platform for Non-Programmers and Programmers Alike
Source: bioRxiv or medRxiv preprint supplement (doi:10.1101/173005), 2018-12-18
Supplement: Supplementary file [file 173005-1.pdf]

# NeatSeq-Flow: A Lightweight Software For Efficient Execution Of High Throughput Sequencing Workflows

Menachem Sklarz<sup>1,\*</sup>, Michal Gordon<sup>1</sup> and Vered Chalifa-Caspi<sup>1,\*</sup>

<sup>1</sup>Bioinformatics Core Facility, National Institute for Biotechnology in the Negev, Ben-Gurion University of the Negev, 84105, Beer-Sheva, Israel,

\* Corresponding authors

## Supplementary information

**Abstract:** Bioinformatics workflows (WFs) in general, and those involving next generation sequencing (NGS) data in particular, typically involve executing a sequence of programs on raw sequence files from as many as thousands of samples. Management of these WF is laborious and error-prone. We have developed NeatSeq-Flow, a python package that manages WF creation for execution on computer clusters. NeatSeq-Flow creates shell scripts as well as a directory structure for storing analysis results, error messages, and execution logs. The user maintains full control over the execution of the WF, while the computer cluster enforces sequential execution and parallelization. NeatSeq-Flow also supplies tools for version tracking, documentation and execution logging.

Users may add modules for open source, commercial or custom programs not included in the basic package using basic python code (see template in Fig. S5). Detailed instructions for module creation can be found at (<http://neatseq-flow.readthedocs.io/en/latest/>). It is our hope that the community of users will contribute additional modules to the public.

Availability: <https://github.com/bioinfo-core-BGU/neatseq-flow>

Documentation: <http://neatseq-flow.readthedocs.io/en/latest/>

Additional info: <http://in.bgu.ac.il/en/bioinfo/Pages/software/neatseq-flow.aspx>

## Contents

|                                                                        |    |
|------------------------------------------------------------------------|----|
| Example workflow .....                                                 | 3  |
| Figure S1. NeatSeq-Flow example parameter-file .....                   | 4  |
| Figure S2. NeatSeq-Flow example sample-file.....                       | 7  |
| Figure S3. Tree structure of an example NeatSeq-Flow workflow.....     | 8  |
| Table S4. Modules currently included in NeatSeq-Flow.....              | 9  |
| Figure S5. NeatSeq-Flow module template .....                          | 10 |
| Figure S6. Description of NeatSeq-Flow output directory structure..... | 12 |
| References .....                                                       | 16 |

## Example workflow

Following is an example of a basic WF (see figure S1 for the parameter file and figure S2 for the sample file). The purpose of the example WF is to perform quality testing and trimming on a set of fastq sequence files, align the sequences to a reference genome and create bigwig files for display in the UCSC genome browser (Kent et al., 2002). Additionally, the example WF creates a report on the quality of the reads and on the mapping of the reads to the reference.

All NeatSeq-Flow WFs begin with the merge module, which copies the raw files from their original locations to the data directory, decompresses them, if necessary, and merges split files into a single file (per direction, in case of paired end reads). The `fatsqc_html` and `trimmo` modules are included for quality testing with FastQC (<http://www.bioinformatics.babraham.ac.uk/projects/fastqc/>) and trimming with `trimmomatic` (Bolger et al., 2014), respectively.

The sequences are then aligned to a reference genome with `bowtie2` (`bowtie2_mapper` module) and `bowtie` (`bowtie_mapper` module). The SAM files produced from each of these mapping strategies are sorted and compressed with `samtools`, converted to bedgraph format with `genomeCoverageBed` from `bedtools` (Quinlan and Hall, 2010) and to bigwig format with `bedGraphToBigWig` (Kent et al., 2010).

Finally, the results of FastQC and mapping steps are graphically presented in a single MultiQC (<http://multiqc.info/>) report.

A graphical representation of the WF is shown in figure S3. Note the two parallel mapping branches and the convergence of the fastQC and samtools steps in the MultiQC step, which makes the MultiQC step create a report containing data from both fastQC and both mapping branches.

The structure of the WF and the directories and scripts produced are summarized in supplementary figure S6 below.

## Figure S1. NeatSeq-Flow example parameter-file

The parameter file used by NeatSeq-Flow is in YAML format. It includes two main blocks: Global\_params and Step\_params. See examples below and package documentation for a complete description of the expected format.

```
##### Parameter file

##### Global definitions:

Global_params:
  ##### QSUB options
  ## It is required that you define a queue on which to run default scripts.
  ## You can override this option in the per-module definitions below
  Qsub_q: queue.q
  ## You can limit the scripts to specific nodes in the queue. Make sure all the nodes are accessible to the
  queue defined in Qsub_q!
  ## The node list can be either comma separated or on different Qsub_nodes lines, or both:
  Qsub_nodes: [node1,node2]
  ## You can pass additional default qsub parameters as follows. These will be added to all scripts:
  Qsub_opts: -V -cwd
  ## Default_wait defines the time to wait between steps to ensure the job scheduler registers the jobs
  correctly and hence keeps them running in correct order:
  Default_wait: 10

Step_params:

#####
##### Module definitions:
# Module instances are defined in YAML format, along the following guidelines:
# 1. The instance name (one indent)
# 2. Within each instance, define the following compulsory elements:
#   2a. 'module': The module to use to create the scripts
#   2b. 'base': The base instance from which to take input files ('merge' is the only exception. Since it is
#       first, you do not define a base).
#   2c. 'script_path': The full path to the program to be executed.
# 3. Additional program arguments can be passed to the program within a 'redirects' group. Make sure you keep
# the leading '-' and '--' symbols in the parameter name (see examples below)
# 4. Default qsub parameters can be overridden with parameters within a 'qsub_params' group.
#   4a. Default queue and nodes can be overridden with 'node' and 'queue' params within the 'qsub_params' group.
# 5. Some modules require transferring additional information. See module documentation for these options.

##### merge parameters
#
  mergel:
    module: merge
    script_path:      gzip -cd          # When raw files are fastq.gz
    # script_path:    cat              # When raw files are unzipped fastq
    # script_path:    dsrc d -s        # When raw files are fastq.dsrc2

##### trimmo
#
# Sample parameters for regular trimmomatic implementation:
  triml:
    module:          trimmo
    base:            mergel
    script_path:     java -jar trimmomatic-0.32.jar
    todo:            ILLUMINAFLIP:TruSeq3-SE.fa:2:30:10 LEADING:20 TRAILING:20 SLIDINGWINDOW:4:15
MINLEN:36
    qsub_params:
      node:          node1
      -pe:           shared 20
      -threads:      20

##### fastqc_html
#
# Parameters for fastqc_html function running on the merge results
  fqc_mergel:
    module:          fastqc html
```

```

base:                merge1
script_path:         /path/to/FastQC/fastqc
qsub_params:
  -pe                shared 15
redirects:
  --threads          15

# Parameters for fastqc_html running on the trimmo results
fgc_trim1:
  module:            fastqc_html
  base:              trim1
  script_path:       /path/to/FastQC/fastqc
  qsub_params:
    -pe              shared 15
  redirects:
    --threads        15

##### bowtie2_mapper
# Sample parameters for bowtie2_mapper
bwt2_1:
  module:            bowtie2_mapper
  base:              trim1
  script_path:       /path/to/bowtie2
  get_map_log:       # Send the log data from stderr to a log file in data/...
  ## The following defines a reference genome INCLUDING THE .fa. MAKE SURE TO BUILD AN INDEX WITH bowtie-
  build BEFORE THE ANALYSIS
  ## This is important for downstream steps which might require the reference genome. DON'T NEGLECT!!!
  ref_genome:        /path/to/ref_genome.fna
  qsub_params:
    -pe: shared 20
  redirects:
    -q:
    -p:                20
    -x:                /path/to/ bowtie2_index/hg19.bt2ind

##### samtools
# Parameters for Samtools function
# after running mapper, convert sam to bam, sort and index it.
# You can also request removal of old sam and unsorted bam files.
sam_bwt2_1:
  module:            samtools
  base:              bwt2_1
  script_path:       /path/to/samtools/bin/samtools
  qsub_params:
    -pe: shared 20
  view:              -buh -q 30 -@ 20 -F 4      # Here you can list samtools view parameters
  sort:              -@ 20                    # Here you can list samtools sort parameters
  index:
  flagstat:
  stats:             --remove-dups
  idxstats:
  del_unsorted:      # Remove unsorted BAM file after sorting
  del_sam:           # Remove SAM file after conversion

##### genomeCoverageBed
## Uses the BAM file to create a bedgraph using the genomeCoverageBed program
genCovBed_bwt2_1:
  module:            genomeCoverageBed
  base:              sam_bwt2_1
  script_path:       /path/to/bedtools/bin/genomeCoverageBed
  redirects:
    -g:              /path/to/ref_genome/ref_genome.chrom.sizes

##### UCSC_BW_wig
## Converts a bedgrapg (bdg) file into bigwig (bw) and wiggle (wig) formats with the bedGraphToBigWig and
bigWigToWig scripts of kentUtils, respectively.
## Operates on the existing bdg file in the sample, created by genomeCoverageBed
UCSCmapfiles_bwt2_1:
  module:            UCSC_BW_wig
  base:              genCovBed_bwt2_1
  script_path:       /path/to/kentUtils/bin      # This is the bin path, unlike the regular script_path!
  genome:            /path/to/ref_genome/ref_genome.chrom.sizes
## If you want to pass params to one of these scripts, do it as follows rather than using redirect parameters
bedGraphToBigWig_params:  -blockSize 10 -itemsPerSlot 20
bigWigToWig_params:      -chrom X1 -start X2 -end X3

```

```

##### bowtie1_mapper

bwt1:
  module:    bowtie1_mapper
  base:      trim1
  script_path: /path/to/bowtie
## The following defines a reference genome INCLUDING THE .fa. MAKE SURE TO BUILD AN INDEX WITH bowtie-build
BEFORE THE ANALYSIS
## This is important for downstream steps which might require the reference genome. DON'T NEGLECT!!!
  ref_genome: /path/to/ref_genome.fna
  ebwt:       /path/to/bowtie1_index/ hg19.bt1ind
  qsub_params:
    -pe:      shared 20
  redirects:
    -p        20

##### samtools
# Parameters for Samtools function
# after run mapper, convert sam - to - bam, sort and index it
sam_bwt1_1:
  module:    samtools
  base:      bwt1
  script_path: /path/to/samtools/bin/samtools
  qsub_params:
    -pe:      shared 20
  view:      -buh -q 30 -@ 20 -F 4 # Here you can list samtools view parameters
  sort:      -@ 20 # Here you can list samtools sort parameters
  index:
  flagstat:
  stats:     --remove-dups
  idxstats:
  del_unsorted: # Remove unsorted BAM file after sorting
  del_sam:     # Remove SAM file after conversion

##### genomeCoverageBed
## Uses the BAM file to create a bedgraph using the genomeCoverageBed program
genCovBed_bwt1_1:
  module:    genomeCoverageBed
  base:      sam_bwt1_1
  script_path: /path/to/bedtools/bin/genomeCoverageBed
  redirects:
    -g:      /path/to/ref_genome/ref_genome.chrom.sizes

##### UCSC_BW_wig
## Converts a bedgraph (bdg) file into bigwig (bw) and wiggle (wig) formats with the bedGraphToBigWig and
bigWigToWig scripts of kentUtils, respectively.
## Operates on the existing bdg file in the sample, created by genomeCoverageBed
UCSCmapfiles_bwt2_1:
  module:    UCSC_BW_wig
  base:      genCovBed_bwt1_1
  script_path: /path/to/kentUtils/bin # This is the bin path, unlike the regular script_path!
  genome:    /path/to/ref_genome/ref_genome.chrom.sizes
## If you want to pass params to one of these scripts, do it as follows rather than using redirect parameters
  bedGraphToBigWig_params: -blockSize 10 -itemsPerSlot 20
  bigWigToWig_params:     -chrom X1 -start X2 -end X3

QC_and_map_MultiQC:
  module:    Multiqc
  # Note that an instance can be based on more than one instance:
  base:
    - fqc_merge1
    - fqc_trim1
    - sam_bwt2
    - sam_bwt1
  script_path: /path/to/multiqc

```

## Figure S2. NeatSeq-Flow example sample-file

```
##### Sample file
#SampleID  Type      Path
Sample1    Single    Sample1a.fastq
Sample1    Single    Sample1b.fastq
Sample2    Single    Sample2a.fastq
Sample2    Single    Sample2b.fastq
```

## Figure S3. Tree structure of an example NeatSeq-Flow workflow

Each circle represents a step in the workflow. The color represents the module, the name of which also appears in the circles in brackets. In this case, there are two instances of the fastqc\_html module, one testing the original fastq files and one testing the files produced by the trimmo module. After the trimmo step, there are two main branches, which are identical but for the fact that one branch (on the left) uses bowtie (bowtie1\_mapper) for aligning the sequences to the genome while the other branch uses bowtie2 (bowtie2\_mapper module).

Results from QC steps and mapping steps are summarized in a graphical report produced by MultiQC (QC\_and\_map\_MultiQC step). To achieve this, QC\_and\_map\_MultiQC is based on all steps which produce input for it, namely both fastqc\_html steps and both samtools steps. This is represented by the convergence of the 4 steps into the Multiqc step.

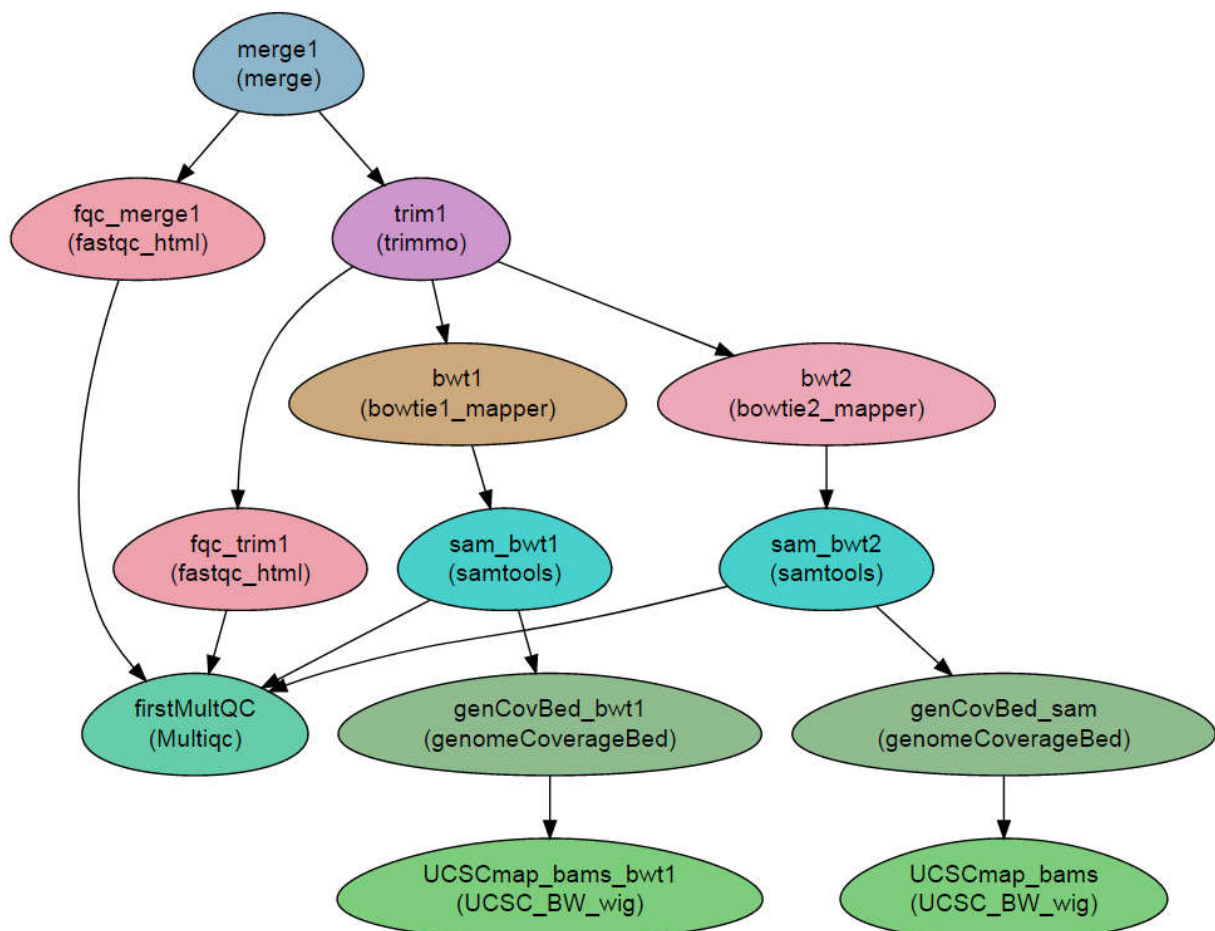



**Table S4. Modules currently included in NeatSeq-Flow**

| Group          | Module name       | Program                            | Description                                                                                      |
|----------------|-------------------|------------------------------------|--------------------------------------------------------------------------------------------------|
| Preparation    | merge             | -                                  | Copies the raw files, decompresses zipped files and concatenates multiple files.                 |
|                | fastqc_html       | fastqc                             | Runs the quality checking software FastQC on all fastq files                                     |
|                | Trimmo            | trimmomatic                        | Trims the reads by quality                                                                       |
| Read alignment | bowtie1_mapper    | bowtie                             | Maps fastq files to genomes with bowtie                                                          |
|                | bowtie2_mapper    | bowtie2                            | Maps fastq files to genomes with bowtie2                                                         |
|                | bwa_mapper        | Bwa                                | Maps fastq files to genomes with bwa                                                             |
|                | bowtie1_builder   | bowtie-build                       | Builds a bowtie index for fasta files                                                            |
|                | bowtie2_builder   | bowtie2-build                      | Builds a bowtie2 index for fasta files                                                           |
|                | bwa_builder       | bwa index                          | Builds a bwa index for fasta files                                                               |
|                | samtools          |                                    | Runs various samtools on the SAM file produced by alignment modules.                             |
|                | genomeCoverageBed | bedtools genomecov                 | Computes BEDGRAPH summaries of feature coverage for a given genome.                              |
| BLAST          | makeblastdb       | makeblastdb                        | Creates a BLAST database from project or sample fasta files.                                     |
|                | blast             | Any program from the BLAST family. | Runs any type of blast using project or sample fasta files as query or database.                 |
| Assembly       | primer_search     | primer_search_wrapper.R            | Runs a primer search wrapper available <a href="#">from here</a>                                 |
|                | spades_assembl    | SPAdes                             | Assembles reads with SPAdes.                                                                     |
|                | quast             | quast.py                           | Produces quast report on an assembly.                                                            |
|                | trinity           | Trinity assembler                  | Assemble sample or project reads. Used mainly for assembling transcriptomes.                     |
|                | add_trinity_tags  | -                                  | Adds tags required by trinity to read names.                                                     |
| UCSC           | UCSC_BW_wig       | bedGraphToBigWig & bigWigToWig     | Creates bigwig and wig coverage files compatible with UCSC                                       |
| ChIP-seq       | macs2_callpeak    | callpeak                           | Runs callpeak on the BAM files. Note: Requires defining sample:control pairs in the sample file. |
| Reporting      | Multiqc           | MultiQC                            | Creates a report for various file formats: FastQC, bowtie2 log, samtools stats and others.       |
| IGV and        | IGV_count         | igvtools count                     | Converts BAM or SAM files into TDF files for viewing in IGV                                      |
| UCSC           | IGV_toTDF         | igvtools toTDF                     | Converts wiggle files into TDF files for viewing in IGV                                          |

## Figure S5. NeatSeq-Flow module template

```
import os
import sys
from PLC_step import Step,AssertionExcept

__author__ = "Author"

class Step_MODULENAME(Step):

    def step_specific_init(self):
        self.shell = "bash" # Can be set to "bash" by inheriting instances

        # Various assertions
        if CONDITION:
            raise AssertionError("ERROR MESSAGE\n")

    def step_sample_initiation(self):
        """ A place to do initiation stages following setting of sample_data
        """

        # Testing a condition on each sample
        # Useful for making sure all samples include the input files required by the module.
        for sample in self.sample_data["samples"]: # Getting list of samples out of samples_hash
            if (CONDITION ON sample_data):
                raise AssertionError("ERROR MESSAGE\n")

    def create_spec_wrapping_up_script(self):
        """ Define self.script to add a script to be executed after all other scripts have terminated
        """
        pass

    def build_scripts(self):
        """ This is the actual script building function
        Most, if not all, editing should be done here
        """

        # Loop over list of samples out of samples_hash and create script for each sample
        for sample in self.sample_data["samples"]:

            # Make a dir for the current sample:
            sample_dir = self.make_folder_for_sample(sample)

            # Name of specific script:
            self.spec_script_name = "_".join([self.step,self.name,sample])
            self.script = ""

            # This line should be left before every new script. It sees to local issues.
            # Use the dir it returns as the base_dir for this step.
            use_dir = self.local_start(sample_dir)

            # Define location and prefix for output files:
            # You can replace _MODULE_SUFFIX with anything you like.
            output_prefix = use_dir + sample + "_MODULE_SUFFIX"

            # Get constant part of script:
            # Adds lines for environmental variables, script path and redirected parameters
            self.script += self.get_script_const()
            # Specifically add input and output files:
            # This changes per module. The input files MUST BE taken from the sample_data dictionary!
            self.script += "%s \\n\t" % self.sample_data[sample]["fasta"]["nucl"]
            self.script += "%s \n\n" % output_prefix

            # Put the output file/s in the sample_data dictionary
            # If output file is standard format, put in suitable slot.
            # If not, you can invent a slot for it, in a sensible way.
            self.sample_data[sample][...][...] = output_prefix
```

```
self.sample_data[sample][...][...] = ...
# Mark file for md5 stamping in log files:
# Repeat for each file created by the module that you wish to stamp
self.stamp_file(self.sample_data[sample][...][...])

# Move all files from temporary local dir to permanent base_dir
self.local_finish(use_dir,sample_dir)

# Required line. Leave as is.
self.create_low_level_script()

def make_sample_file_index(self):
    """ Make file containing samples and target file names.
        see blast module for implementation.
    """
    pass
```

## Figure S6. Description of NeatSeq-Flow output directory structure

1. The main directory structure.

The directories are elaborated on below.

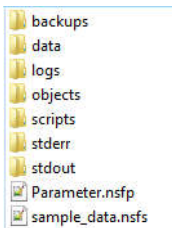

2. The **scripts** directory.

The `00.pipe.commands.csh` scripts executes the entire workflow

The scripts beginning `01.merge...` etc. execute entire steps.

The actual scripts running each step per sample or on the entire project are contained in the equivalent directories `01.merge...` etc.

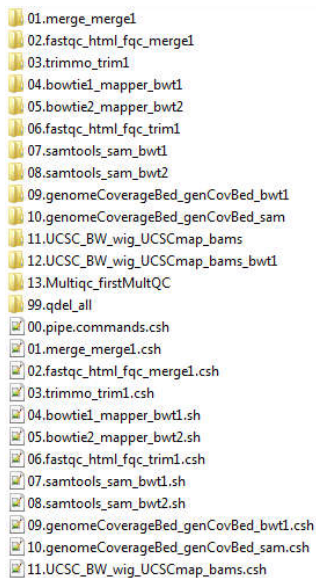

3. The **data** directory

In the data directory, the analysis outputs are organized by module, by module instance and by sample. Below is the data directory for the example, showing the tree organization for the

bowtie2\_mapper and Multiqc modules.

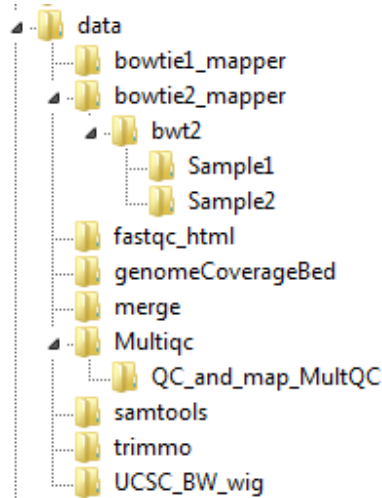

4. The **backup** directory contains a history of workflow sample and parameter files.

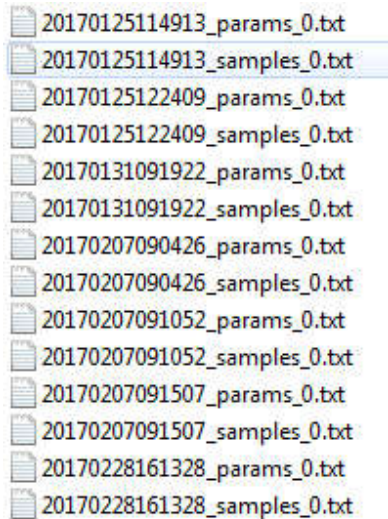

5. The **logs** directory contains various logging files:
- version\_list. A list of all the versions of the workflow with equivalent comments
  - file\_registration. A list of files produced, including md5 signatures, and the script and workflow version that produced them
  - log\_file\_plotter.R. An R script for producing a plot of the execution times. (Run with Rscript and receives a single argument – a log file to plot)

- d. `log_<workflow_ID>.txt`. Log of the execution times of the script per workflow version ID.

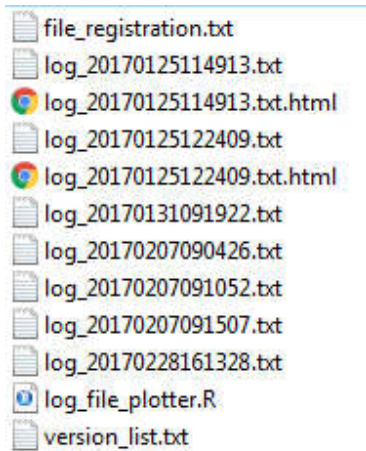

- e. `log_<workflow_ID>.txt.html`. Graphical representation of the progress of the WF execution, as produced by the `log_file_plotter.R` script.

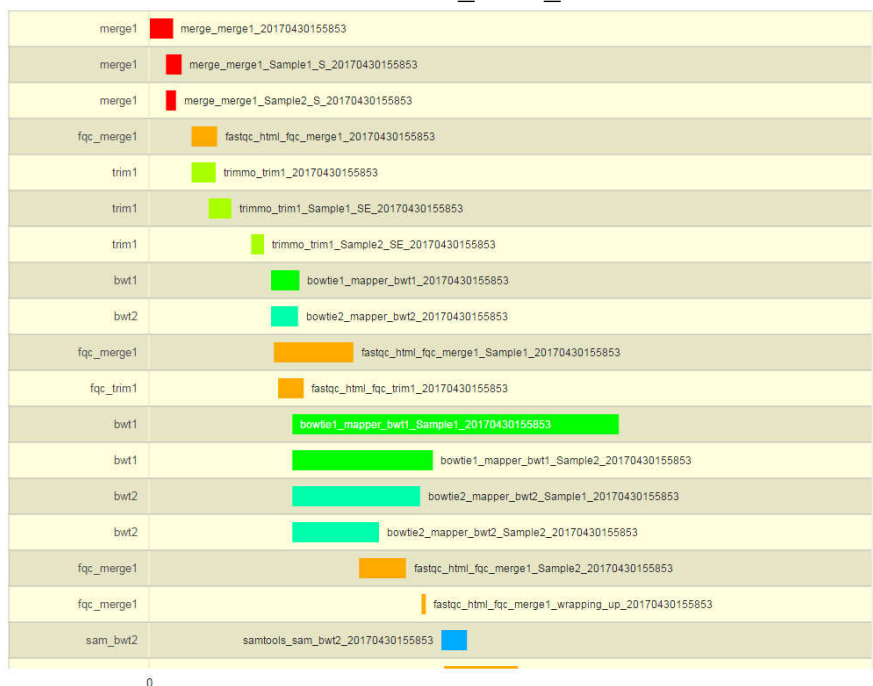

6. The `stderr` and `stdout` directories store the script standard error and outputs, respectively. These are stored in files containing the module name, module instance, sample name, workflow

ID and cluster job ID.

```
bowtie1_mapper_bwt1_20170125114913.e1081873
bowtie1_mapper_bwt1_20170125122409.e1082035
bowtie1_mapper_bwt1_Sample1_20170125114913.e1081889
bowtie1_mapper_bwt1_Sample1_20170125114913.pe1081889
bowtie1_mapper_bwt1_Sample1_20170125122409.e1082062
bowtie1_mapper_bwt1_Sample1_20170125122409.pe1082062
bowtie1_mapper_bwt1_Sample2_20170125114913.e1081890
bowtie1_mapper_bwt1_Sample2_20170125114913.pe1081890
bowtie1_mapper_bwt1_Sample2_20170125122409.e1082064
bowtie1_mapper_bwt1_Sample2_20170125122409.pe1082064
bowtie2_mapper_bwt2_20170125114913.e1081876
bowtie2_mapper_bwt2_20170125122409.e1082036
bowtie2_mapper_bwt2_Sample1_20170125114913.e1081901
bowtie2_mapper_bwt2_Sample1_20170125114913.pe1081901
bowtie2_mapper_bwt2_Sample1_20170125122409.e1082061
bowtie2_mapper_bwt2_Sample1_20170125122409.pe1082061
bowtie2_mapper_bwt2_Sample2_20170125114913.e1081902
bowtie2_mapper_bwt2_Sample2_20170125114913.pe1081902
bowtie2_mapper_bwt2_Sample2_20170125122409.e1082063
bowtie2_mapper_bwt2_Sample2_20170125122409.pe1082063
```

7. The **objects** directory contains various files describing the workflow: An SVG diagram, an R script - `diagrammer.R` – for producing a DiagrammerR diagram of the workflow, and `pipedata.json`, containing all the workflow data in JSON format, for uploading to JSON compliant databases etc. (`workflow_graph.html` is the output from executing `diagrammer.R`).

The `diagrammer.R` script requires installing the 'Diagrammer' and 'htmlwidgets' packages.

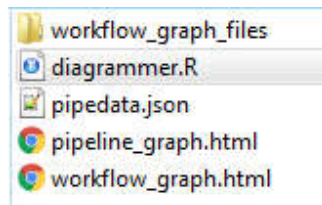

```
workflow_graph_files
diagrammer.R
pipedata.json
pipeline_graph.html
workflow_graph.html
```

## References

- Bolger,A.M., Lohse,M., *et al.* (2014) Trimmomatic: a flexible trimmer for Illumina sequence data. *Bioinformatics*, 30, 2114-2120.
- Hatakeyama,M., Opitz,L., *et al.* (2016) SUSHI: an exquisite recipe for fully documented, reproducible and reusable NGS data analysis. *BMC Bioinformatics*, 17, 228.
- Kent,W.J., Sugnet,C.W., *et al.* (2002) The Human Genome Browser at UCSC. *Genome Res.*, 12, 996-1006.
- Kent,W.J., Zweig,A.S., *et al.* (2010) BigWig and BigBed: enabling browsing of large distributed datasets. *Bioinformatics*, 26, 2204-2207.
- Köster,J. and Rahmann,S. (2012) Snakemake—a scalable bioinformatics workflow engine. *Bioinformatics*, 28, 2520-2522.
- Langmead,B. and Salzberg,S.L. (2012) Fast gapped-read alignment with Bowtie 2. *Nature methods*, 9, 357-359.
- Leipzig,J. (2016) A review of bioinformatic pipeline frameworks. *Briefings in Bioinformatics*, bbw020.
- Li,H., Handsaker,B., *et al.* (2009) The Sequence Alignment/Map format and SAMtools. *Bioinformatics*, 25, 2078-2079.
- Linke,B., Giegerich,R., *et al.* (2011) Conveyor: a workflow engine for bioinformatic analyses. *Bioinformatics*, 27, 903-911.
- Quinlan,A.R. and Hall,I.M. (2010) BEDTools: a flexible suite of utilities for comparing genomic features. *Bioinformatics*, 26, 841-842.
- Sadedin,S.P., Pope,B., *et al.* (2012) Bpipe: a tool for running and managing bioinformatics pipelines. *Bioinformatics*, 28, 1525-1526.
- Stocker,G., Rieder,D., *et al.* (2004) ClusterControl: a web interface for distributing and monitoring bioinformatics applications on a Linux cluster. *Bioinformatics*, 20, 805-807.
